# Supplementary material for: Photoluminescence and structural phase transition relationship in Er-doped BaTiO3 model ferroelectric system
Source: Royal Society of Chemistry journal article supplement (doi:10.1039/d3tc02991c), 2023-12-05
Supplement: d3tc02991c1.pdf [file d3tc02991c1.pdf]

## Electronic supplementary information

### Photoluminescence and structural phase transition relationship in Er-doped BaTiO<sub>3</sub> model ferroelectric system

J. Zou,<sup>\*a</sup> S. Hao,<sup>a,b</sup> P. Gemeiner,<sup>a</sup> N. Guiblin,<sup>a</sup> O. Ibder,<sup>a</sup> B. Dkhil,<sup>a</sup> C. Paillard<sup>a,c</sup>

<sup>a</sup> Université Paris-Saclay, CentraleSupélec, SPMS Laboratory, CNRS-UMR8580, 91190 Gif-sur-Yvette, France.

<sup>b</sup> Key Laboratory of Polar Materials and Devices (MOE), Ministry of Education, Shanghai Center of Brain-inspired Intelligent Materials and Devices, Department of Electronics, East China Normal University, Shanghai 200241, China.

<sup>c</sup> Physics Department and Institute for Nanoscience and Engineering, University of Arkansas, Fayetteville, Arkansas 72701, USA.

\*J. Zou is the corresponding author (E-mail: [jingye.zou@centralesupelec.fr](mailto:jingye.zou@centralesupelec.fr))

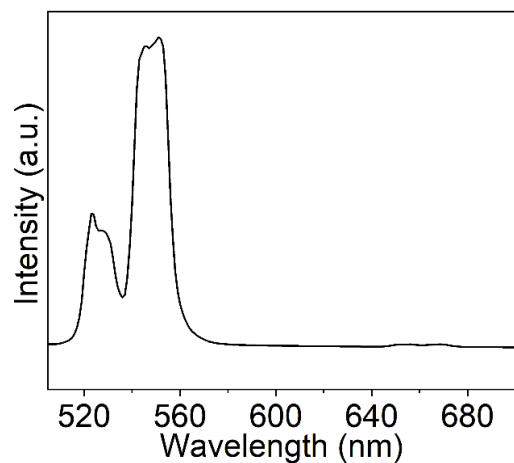

**Figure S1:** PL spectrum of Er-BTO in the visible 500-700 nm range showing green bands are much stronger than the red ones located around 650 nm.

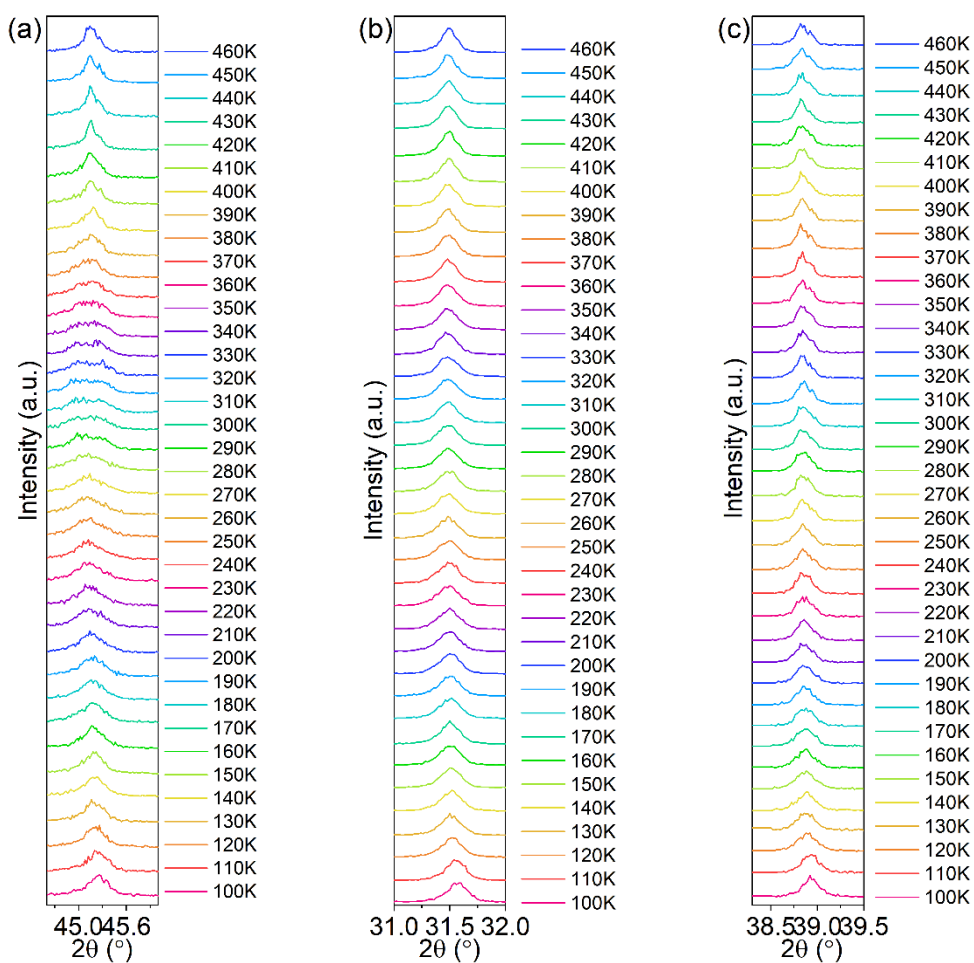

**Figure S2:** Temperature dependent XRD patterns around the {200}, {110}, {111} diffraction peaks (around  $2\theta=45^\circ$ ,  $31.5^\circ$  and  $39^\circ$ , respectively) of Er-BTO.
